# Supplementary material for: Opportunities for carbon sequestration from removing or intensifying pasture-based beef production
Source: PubMed Central journal article supplement — Proc Natl Acad Sci U S A. 2024 Nov 4;121(46):e2405758121. doi: 10.1073/pnas.2405758121 (PMC11572965; doi:10.1073/pnas.2405758121), 2024-11-04
Supplement: pnas.2405758121.sapp.pdf [file pnas.2405758121.sapp.pdf]

# **Supporting Information for** Opportunities for Carbon Sequestration from Removing or Intensifying Pasture-based Beef Production

Matthew N. Hayek, Johannes Piipponen, Matti Kummu, Kajsa Resare Sahlin, Shelby C. McClelland, and Kimberly Carlson

Corresponding Author: Matthew N. Hayek

Email: [matthew.hayek@nyu.edu](mailto:matthew.hayek@nyu.edu)

## **This PDF file includes:**

Figures S1 to S11  
Table S1

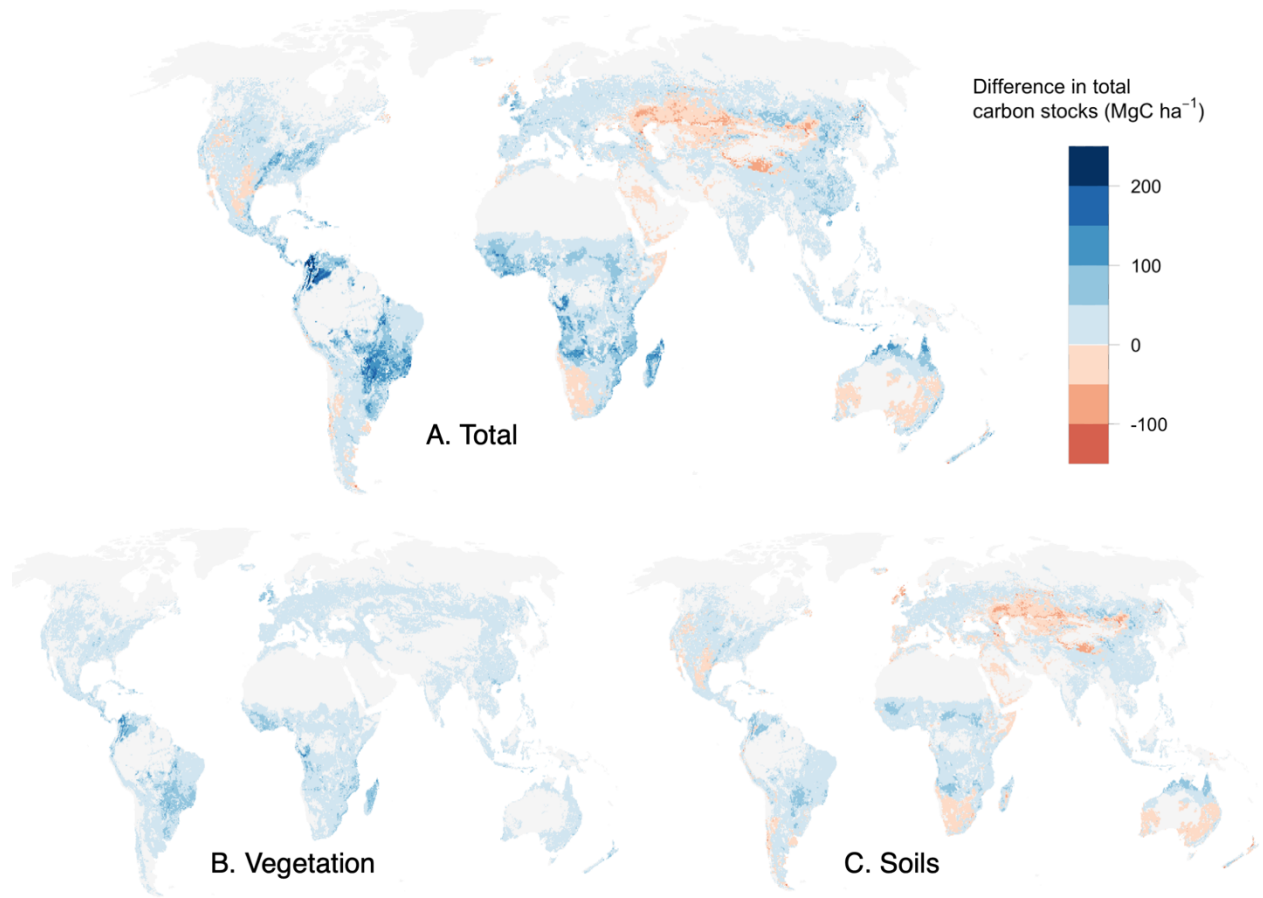

Fig. S1. Carbon opportunity costs of maintaining pastures on the basis of cumulative carbon stock per unit area: difference in potential carbon stocks through 2100 (integrated over 75 years) in A. vegetation + soil combined, B. only vegetation, and C. only soil. Each cell represents the product of the difference in potential and present C stocks in pasture times the area of pasture in that grid cell, divided by the total area in each grid cell.

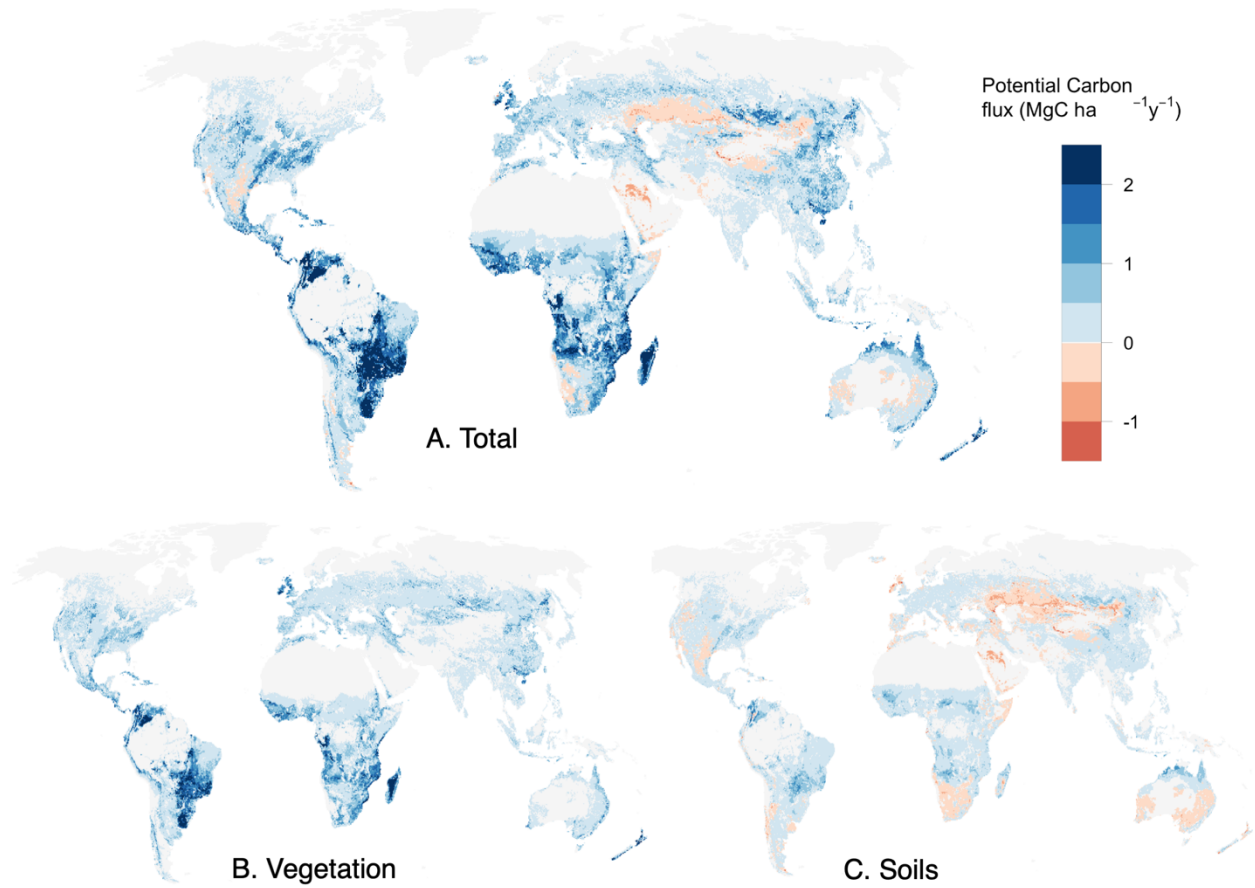

Fig. S2. Carbon opportunity costs of maintaining present-day pastures on the basis of annual carbon flux per unit area, in A. vegetation + soil combined, B. only vegetation, and C. only soil. Each cell represents the product of potential carbon fluxes from regrowing pasture to potential vegetation, times the area of pasture in that grid cell, divided by the total area in each grid cell.

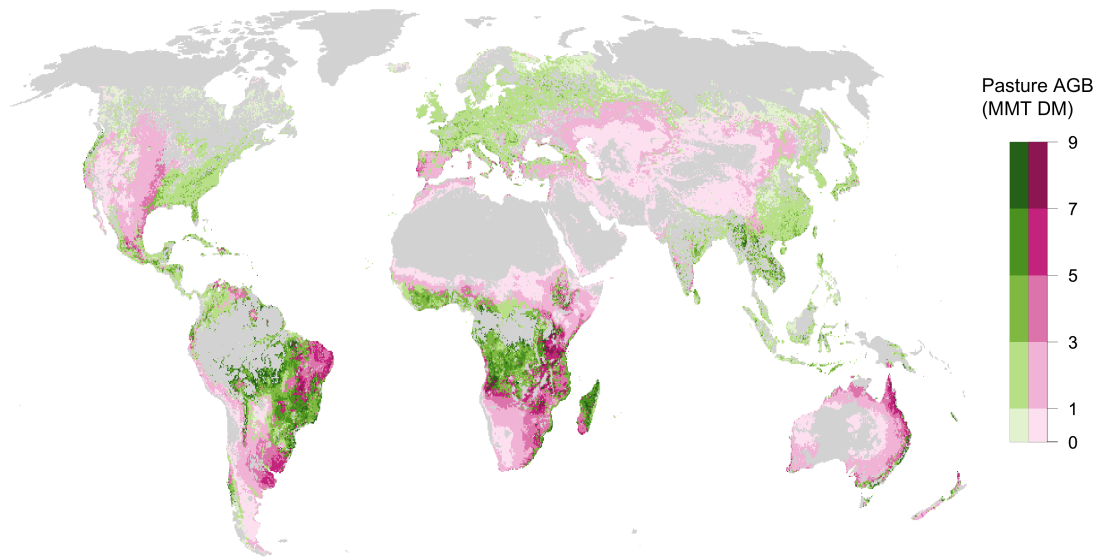

Fig S3. Pasture aboveground biomass (AGB). Green color scale refers to potential forest areas, pink color scale refers to native grassland areas.

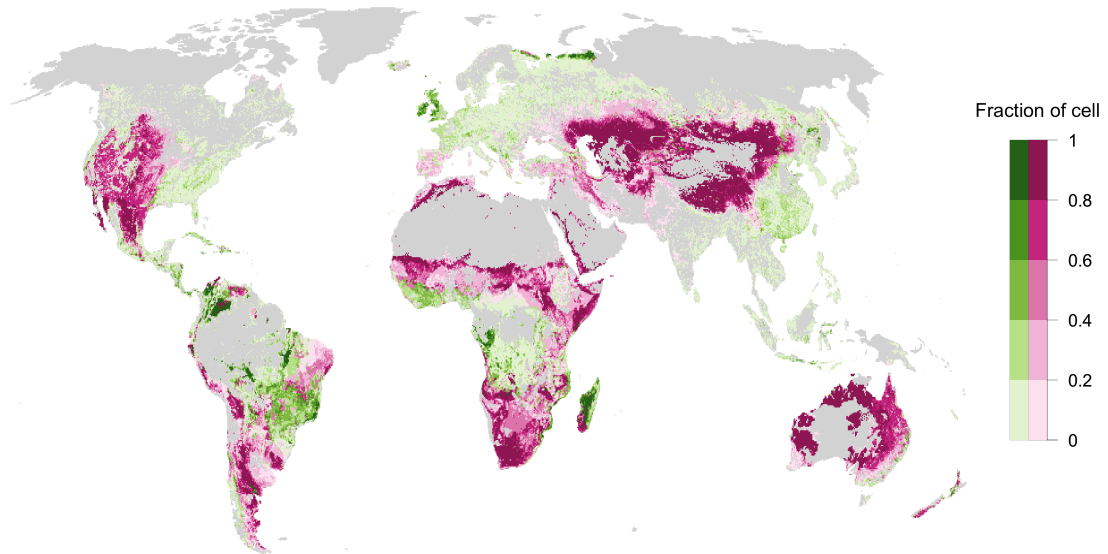

Fig. S4. Fraction of pasture in each grid cell, taken as the sum of all area in pastures plus rangelands, divided by total area of each grid cell. Green color scale refers to potential forest areas, pink color scale refers to native grassland areas.

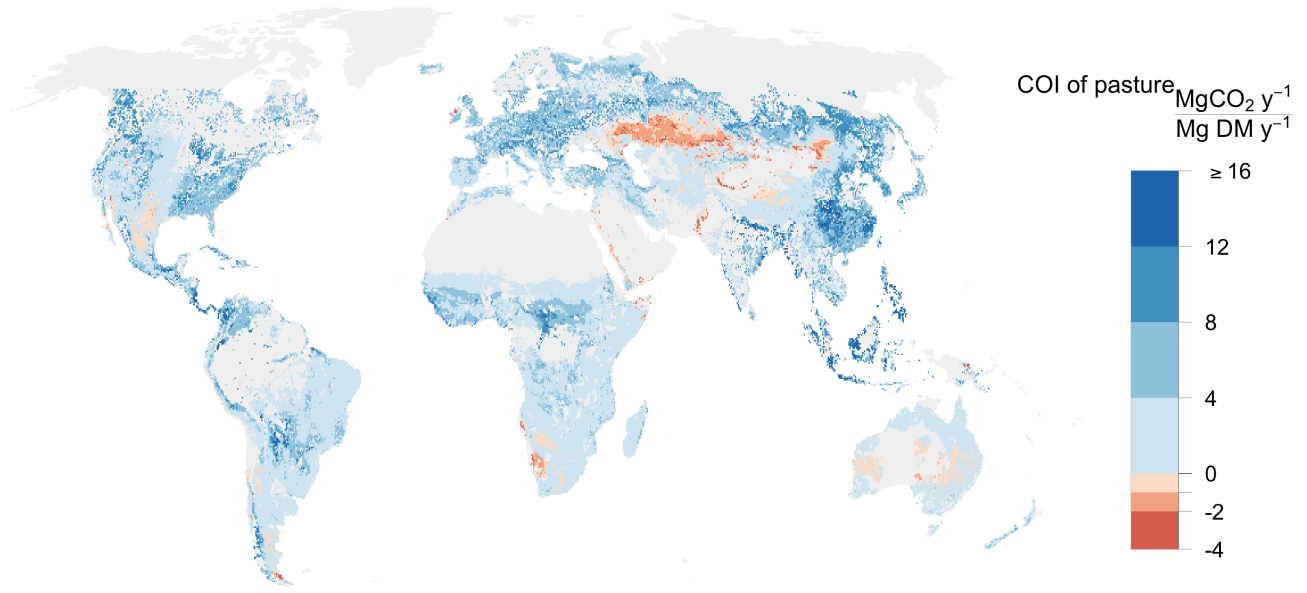

Fig S5. Spatial distribution of COI of pasture production at 5-arcminutes resolution, including negative values.

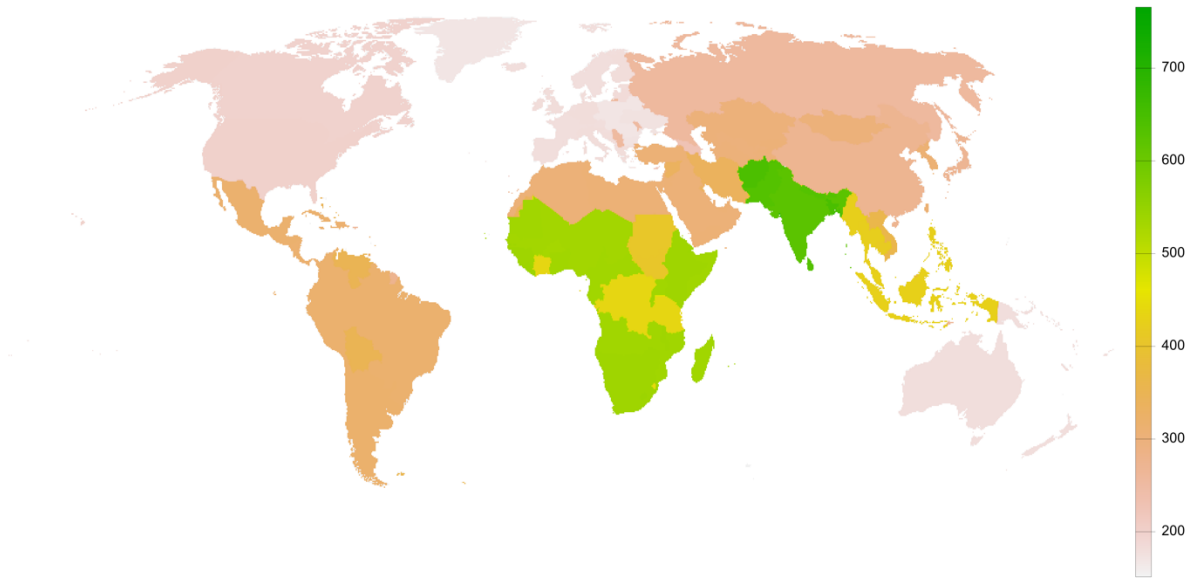

Fig. S6. Feed conversion ratio of pastures to beef in kg Pasture / kg beef protein.

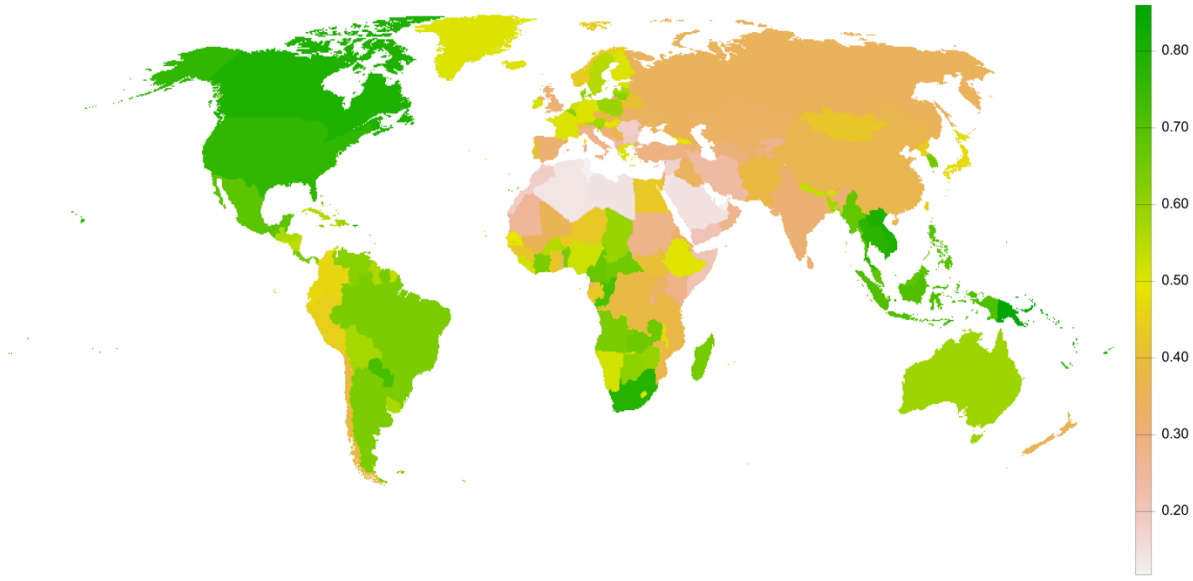

Fig S7. Proportion of pastures producing beef (beef from beef herds and beef from dairy herds combined)

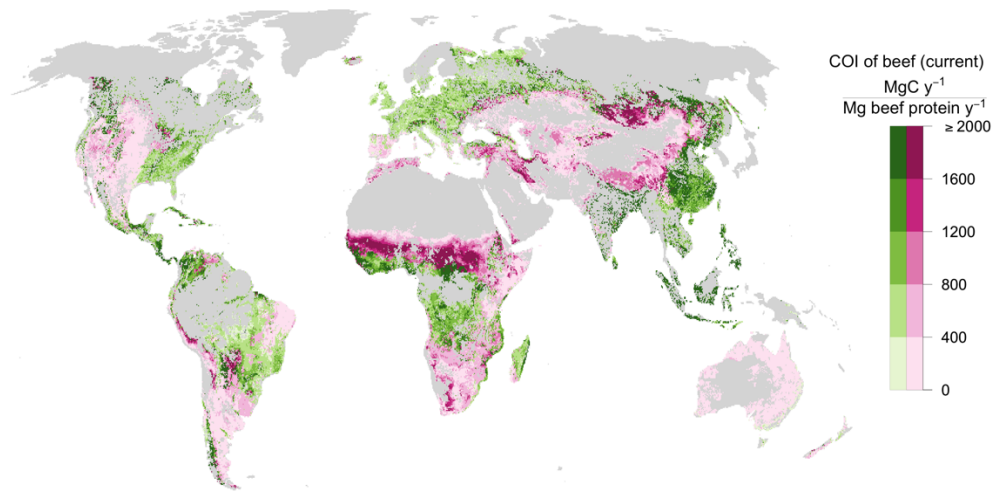

Fig. S8. Carbon Opportunity Intensity of pastured beef at current FCRs. Green color scale refers to potential forest areas, pink color scale refers to native grassland areas.

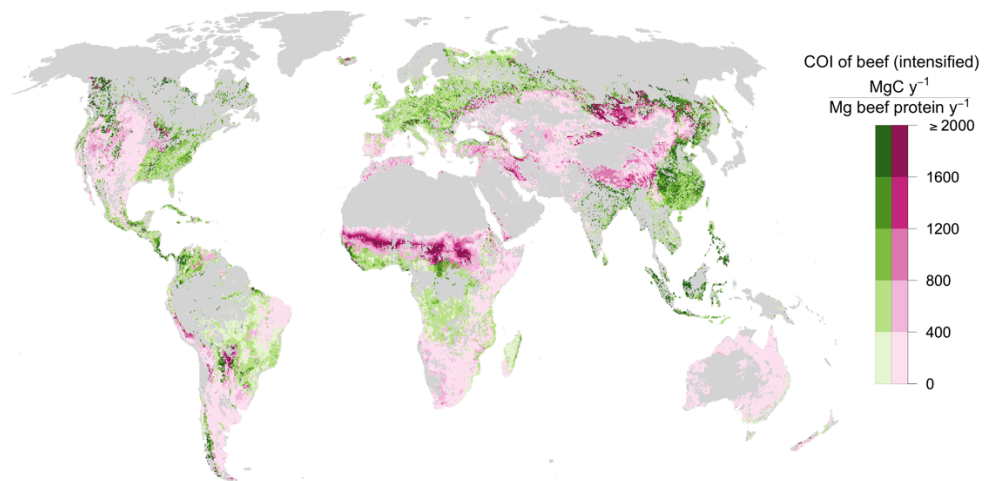

Fig. S9. Carbon Opportunity Intensity of pastured beef at intensified FCRs (90% yield gap closure with OECD countries). Green color scale refers to potential forest areas, pink color scale refers to native grassland areas.

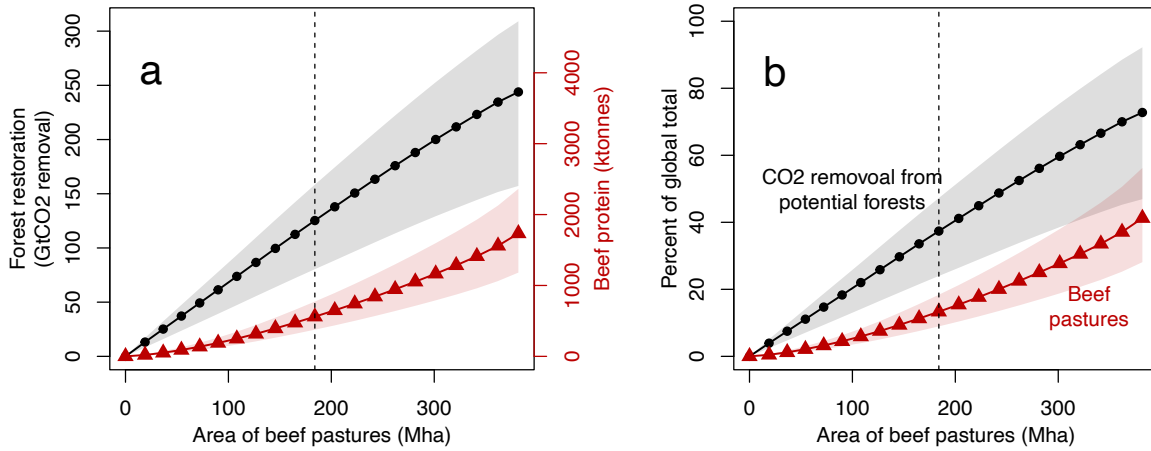

Fig. S10. Total pasture areas in potential forest where high-COI beef production occurs across various thresholds of COI. Each point refers to a 5-percentile point in the distribution of all area-weighted COI values (21 points total). Dashed vertical line corresponds to the area-weighted median COI value (1,974 kgCO<sub>2</sub> per kg beef protein) under a scenario of improved FCRs. (a) global CO<sub>2</sub> removal possible from restoring pastures (black dots; 95% confidence intervals in gray) and quantity of pasture-raised beef production forgone (red triangles; 95% confidence intervals in pink). (b) same as a., but demonstrating percentages of the global total.

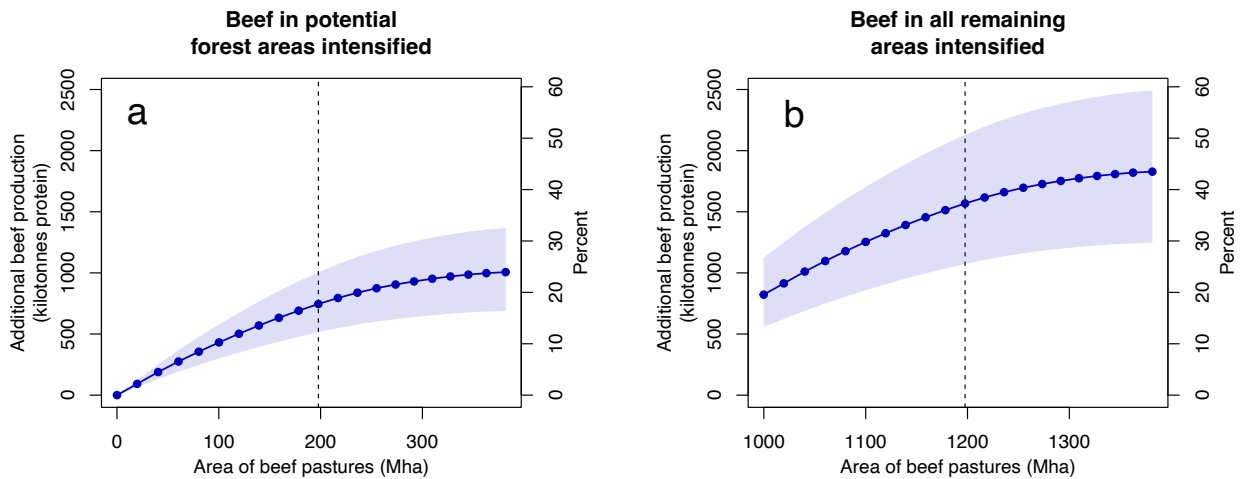

Fig. S11. Total pasture area and additional pastured beef production that could occur through intensification if beef production were removed from high-COI areas (for various COI thresholds of removal, as in Fig. S9) and remaining production areas were intensified. Each point refers to a 5-percentile point in the distribution of all area-weighted COI values (21 points total), above which beef production is removed, and below which pastured beef production is intensified. Current FCRs are intensified to 90% of OECD-average FCRs (202 kg DM per kg beef protein). Dashed vertical line corresponds to pasture area corresponding to the area-weighted median COI value (1,893 kgCO<sub>2</sub> per kg beef protein) under a scenario of improved FCRs. (a) quantity of additional beef that could be produced on pastures in areas of potential forests (b) quantity of additional beef that could be produced on pastures in all remaining areas (potential forests + grasslands combined).



| A. Removal of beef-producing cattle from high-COI areas |                                                | B. Intensification of pastured beef production in remaining potential forest regions |                                               | C. Intensification across all remaining regions (potential forests + grasslands) |                                               |
|---------------------------------------------------------|------------------------------------------------|--------------------------------------------------------------------------------------|-----------------------------------------------|----------------------------------------------------------------------------------|-----------------------------------------------|
| Country                                                 | Beef removed (tonnes protein y <sup>-1</sup> ) | Country                                                                              | Beef gained (tonnes protein y <sup>-1</sup> ) | Country                                                                          | Beef gained (tonnes protein y <sup>-1</sup> ) |
| USA                                                     | 80,637                                         | Brazil                                                                               | 148,136                                       | South Africa                                                                     | 47,420                                        |
| China                                                   | 44,416                                         | Madagascar                                                                           | 96,399                                        | Madagascar                                                                       | 37,642                                        |
| Colombia                                                | 42,132                                         | Angola                                                                               | 83,662                                        | Angola                                                                           | 35,870                                        |
| Russia                                                  | 15,980                                         | Mozambique                                                                           | 34,644                                        | Brazil                                                                           | 28,082                                        |
| Paraguay                                                | 10,242                                         | Zambia                                                                               | 30,502                                        | Argentina                                                                        | 23,694                                        |
| France                                                  | 8,250                                          | Tanzania                                                                             | 20,083                                        | Zambia                                                                           | 14,201                                        |
| Canada                                                  | 8,070                                          | Republic of Congo                                                                    | 14,339                                        | Tanzania                                                                         | 13,864                                        |
| Mexico                                                  | 7,226                                          | South Africa                                                                         | 10,840                                        | Zimbabwe                                                                         | 12,516                                        |
| Indonesia                                               | 7,190                                          | D.R. of the Congo                                                                    | 8,381                                         | Mozambique                                                                       | 12,239                                        |
| Venezuela                                               | 6,758                                          | Gabon                                                                                | 6,021                                         | Kazakhstan                                                                       | 11,898                                        |
| Germany                                                 | 5,817                                          | Bolivia                                                                              | 4,861                                         | Mexico                                                                           | 11,290                                        |
| UK                                                      | 5,536                                          | Nigeria                                                                              | 4,338                                         | Botswana                                                                         | 10,160                                        |
| Poland                                                  | 5,470                                          | Malawi                                                                               | 3,475                                         | Uruguay                                                                          | 9,896                                         |
| Nicaragua                                               | 3,966                                          | Cameroon                                                                             | 3,341                                         | Namibia                                                                          | 9,254                                         |
| Ireland                                                 | 3,565                                          | Zimbabwe                                                                             | 3,250                                         | Mongolia                                                                         | 5,897                                         |

Table S1. Countries ranked by net quantity of pasture-raised beef production removed or added respectively. A. Removed beef production from potential forested pasture areas that remain higher than the area-weighted median COI (1,893 kgCO<sub>2</sub> per kg beef protein) after intensification. B. Beef added by intensifying remaining beef production after high-COI beef removal to 90% of OECD average, in areas of potential forest. C. Beef added by intensifying remaining beef production after high-COI beef removal to 47% of OECD average, in areas of all remaining pastures.
